# Supplementary material for: Response of soil microbial community to plant composition changes in broad-leaved forests of the karst area in Mid-Subtropical China
Source: PeerJ. 2022 Mar 7;10:e12739. doi: 10.7717/peerj.12739 (PMC8908884; doi:10.7717/peerj.12739)
Supplement: Supplemental Information 1 — Raw data from the study presented as tree community composition matrix and soil physiochemical values [file peerj-10-12739-s001.xlsx]

## Sheet: Tree composition -H
Tree number	Species name	DBH cm	Tree height M	Height under branch M	Crown width（EW)m	Crown width（NS)m	coordinateX/m	coordinateY/m
1699	Camptotheca acuminata	7	13.2	1.4	1.5	1.2	8.5	0.5		North latitude:	29°3′36″	East longitude:	110°13′26″
2000	Camptotheca acuminata	21.6	22.3	13.5	4	3.5	8.5	3		Altitude:	651m
2001	Cryptomeria japonica	9	7.2	0.5	3.5	3	7	2.8		Canopy density	0.7
2002	Cryptomeria japonica	8.2	7	0.5	2.5	2	7.5	2		slope	18°
2003	Cryptomeria japonica	12.2	7.3	1.4	2.5	2	7.5	3
2004	Camptotheca acuminata	19.3	22.7	4.8	7	6	6	3.7
2005	Camptotheca acuminata	20.3	19.9	12.8	3	3.3	7.6	5
2006	Camptotheca acuminata	16	18.9	8.7	3	3.2	7.5	6
2007	Cryptomeria japonica	13.3	8.5	1.3	1.2	1.3	5.2	3.5
2008	Camptotheca acuminata	6.7	12.5	2.3	2.3	0.5	5	3.2
2009	Cryptomeria japonica	7.5	5	0.5	0.8	0.6	5	3
2011	Camptotheca acuminata	20	19.4	13.6	5	5	0.7	3
2012	Camptotheca acuminata	20.1	18.5	11.3	3	2.8	0	4.5
2013	Camptotheca acuminata	10.5	14.7	6.3	5.1	3	2.5	4.6
2014	Camptotheca acuminata	8	8.9	1.3	2	1.5	4	5
2015	Camptotheca acuminata	22.4	21.4	7.8	6	6	3	5
2016	Camptotheca acuminata	14.9	16.7	8.5	2	1.7	1.5	6
2017	Cryptomeria japonica	8.4	4.3	0.2	1.5	2	0.5	6.5
2021	Cryptomeria japonica	14.4	10.5	2	2.8	2.2	4	8
2022	Camptotheca acuminata	17.3	20.3	13.6	4	4	3.8	9
2023	Camptotheca acuminata	15.8	17.2	12.1	2.3	2.5	2	8
2024	Camptotheca acuminata	13.5	17.6	10.2	2	2.5	6.5	9
2025	Cryptomeria japonica	14.2	12.6	2	3	4	7	9
2026	Camptotheca acuminata	7.3	14.3	8.6	0.5	1	7.5	8.5
2026-A	Cryptomeria japonica	8.2	5	0.1	1.5	1.2	1.2	5
2027	Camptotheca acuminata	6	11.2	1.6	0.9	0.8	3.8	9.5
2028	Camptotheca acuminata	7.6	12.3	1.5	0.7	0.7
2029	Camptotheca acuminata	8.9	13.4	0.8	0.8	0.9
2030	Camptotheca acuminata	18.9	21.3	13.6	2.3	2.6	4.2	6.3
2031	Cryptomeria japonica	15.9	9.7	1.5	1.9	1.6	4.2	5.6
2032	Camptotheca acuminata	18.7	22.4	15.6	2.5	2.5	6.7	7
2033	Cryptomeria japonica	11	8.3	1.1	1.9	2	4.2	5.3
2034	Camptotheca acuminata	15.6	20.3	14.3	2.3	1.9	9.5	7
2035	Camptotheca acuminata	20.4	24.3	16.4	2.5	2.6	7.9	2.3
2036	Camptotheca acuminata	17.6	21.4	17.5	2.4	2.3	7.1	6.1
2037	Cryptomeria japonica	7.9	6.1	1.6	0.5	0.5	3.8	0.9
2038	Camptotheca acuminata	17.4	24.5	16.9	2.5	2.3	2.1	0.9
2040	Camptotheca acuminata	19.6	23.2	16.2	1.9	2.2	0.7	1.9
2031-1	Cryptomeria japonica	9.7	7.5	1.2	1.7	1.5	4.2	5.6
2212	Camptotheca acuminata	8.3	15.1	4.5	2.5	1.7	4	0.9
2213	Toona sinensis	13.4	16.5	4.8	1.5	2.5	1.2	4.2
2214	Cryptomeria japonica	9.2	8	0.2	2	1.2	3.7	4.3
2215	Camptotheca acuminata	16	20.6	12.7	4	3	4.5	4
2216	Cryptomeria japonica	4.9	5.2	1.4	2	1.6	4	1.7
2217	Camptotheca acuminata	10.4	16.7	1.7	3	4	1.2	0.3
2218	Camptotheca acuminata	14.4	18.6	5.2	2.5	3	6.8	3.2
2219	Cryptomeria japonica	13	10.1	0.2	4	4	5	4.5
2220	Camptotheca acuminata	10.9	23.5	16.8	3	3	3	7
2221	Cryptomeria japonica	17.7	12.1	1.7	4.5	4	0	6.5
2222	Cryptomeria japonica	7.7	6	0.7	3.7	3	6	4
2223	Camptotheca acuminata	9.7	18.2	13.5	2	4.5	1.6	0.2
2224	Cryptomeria japonica	5.6	5	1.3	1.2	1.5	7	3
2225	Cryptomeria japonica	15.1	11.2	1.5	4	4	4	7.5
2226	Camptotheca acuminata	13.7	19.8	8	2.5	2.5	5.8	4
2227	Cryptomeria japonica	10.1	8	1.7	3	2.8	4	7.5
2228	Camptotheca acuminata	19.3	21.6	12.8	5	5.5	0.7	4
2228-A	Cryptomeria japonica	12.7	8.6	1.4	2.4	4	9.8	9.7
2228-B	Liriodendron chinensis	25.6	27	11	6	5	9.7	9
2228-C	Cryptomeria japonica	5.8	6	0.5	2.5	3	7.7	8.5
2228-D	Camptotheca acuminata	8.7	15.6	9	1.2	2	1.5	9.5
2230	Cryptomeria japonica	4.5	5	1	1	1	0.4	0.3
2232	Camptotheca acuminata	12.8	18	13	2	2	9	1
2233	Cryptomeria japonica	6.5	8	1	2	3	0.3	0.3
2234	Camptotheca acuminata	4	10	5	1	1	7.8	0.6
2235	Cryptomeria japonica	——	——	——	——	——	——	——
2236	Camptotheca acuminata	9.8	10	5	3	2	9.7	9.8
2238	Cryptomeria japonica	7	8	1	2	2	9.8	3
2239	Camptotheca acuminata	9.4	12	10	1	1	6	5
2241	Camptotheca acuminata	13.5	19	18	2	2	9	1
2242	Camptotheca acuminata	13.6	15	10	2	1	8.9	7.8
2243	Cryptomeria japonica	——	——	——	——	——	——	——
2244	Cryptomeria japonica	8	11	2	3	3	9.3	4.5
2245	Cryptomeria japonica	8.3	10	1	2	2	9.4	5
2248	Cryptomeria japonica	6.5	5	1	2	2	2.4	8
2249	Camptotheca acuminata	16.8	18	15	3	3	7	7.8
补	Camptotheca acuminata	14.4	15	10	3	3	1.8	9.8
2246	Camptotheca acuminata	7.8	10	5	1	1	1	4.4
2247	Camptotheca acuminata	10.2	13	6	2	2	5.6	6.5
2251	Cryptomeria japonica	9.8	13	2	3	4	9.8	1
2252	Camptotheca acuminata	7	12	8	1	1	5.8	8.4
2253	Camptotheca acuminata	15.4	18	16	2	3	2.4	9.7
2254	Camptotheca acuminata	12.8	15	12	1	1	7	5.4
2255	Camptotheca acuminata	8.7	16	10	5	4	8.7	9.7
2256	Cryptomeria japonica	6.5	9	2	3	3	9	6.5
2257	Cryptomeria japonica	6.2	8	1	3	2	9.5	6.2
2259	Cryptomeria japonica	5.6	8	1	2	2	9.8	6.4
2261	Camptotheca acuminata	15.8	18	12	1	1	0.5	5
2262	Camptotheca acuminata	14.8	18	15	3	3	2.2	3
2263	Camptotheca acuminata	9.5	12	10	1	1	2.2	3.1
2264	Cryptomeria japonica	6.5	8	5	2	2	1	3
2265	Camptotheca acuminata	12.8	15	9	4	4	3	0.9
2266	Camptotheca acuminata	11.5	18	3	2	3	5.8	0.2
2267	Camptotheca acuminata	11.3	15	8	3	2	3.7	2.8
2268	Camptotheca acuminata	7	13	9	3	3	7.5	1.2
2269	Cryptomeria japonica	8.5	8	2	1	1	8.9	1.9
2271	Cryptomeria japonica	9.4	15	8	3	3	8	6.8
2271-A	Camptotheca acuminata	12.7	18	10	2	2	2.2	6.1
2272	Liriodendron chinensis	50.5	2.5	13	4	5	7	2.5
2273	Cryptomeria japonica	4.9	3.5	2	1.8	1.5	4.5	3.4
2275	Cryptomeria japonica	6.3	5.6	2	1.5	1.5	5	3.5
2276	Liriodendron chinensis	15	10	3	1.5	1.5	6	3.5
2277	Cryptomeria japonica	14	8	2	3	2.5	7.5	0.2
2278	Cryptomeria japonica	5	6	1.2	2	1.8	7	0.3
2279	Cryptomeria japonica	11.1	8.5	2	2.5	2.5	9	1
2281	Cryptomeria japonica	6	6	1.5	2.5	3.5	8	4.4
2282	Cryptomeria japonica	5.5	6	1.4	1.5	1.2	7.8	4.6
2283	Cryptomeria japonica	2	3.5	1.2	0.8	1	7.8	4.6
2284	Cryptomeria japonica	5.8	6	1.3	1	1.2	8	4.5
2285	Cryptomeria japonica	4.1	5	1.3	1	0.8	8	4.5
2286	Cryptomeria japonica	20.5	17	1.3	3	3.5	9.5	5
2287	Cryptomeria japonica	9.8	10	1.5	2	1.5	8	9
2288	Cryptomeria japonica	5.5	5	1.4	1.3	1	8	9
2289	Cryptomeria japonica	10.5	11	1.7	1	1	9	9
2290	Cryptomeria japonica	13.3	12	1.9	1.8	2.3	9	9.2
2291	Camptotheca acuminata	7.8	10	6	1	1.2	9	7.5
2292	Cryptomeria japonica	7.7	6	1.5	2.5	3	7	9
2295	Liriodendron chinensis	48.7	24	10	6	7	4	7
2296	Cryptomeria japonica	10.1	6	2.5	3	2.8	4.8	6
2298	Cryptomeria japonica	5.1	5	1.4	2	2	4.5	6
2299	Cryptomeria japonica	14.5	15	1.5	2.5	2	2	7.5
2300	Cryptomeria japonica	8.9	7	1.7	2	2.5	2	9
2301	Liriodendron chinensis	36.9	20	10	4.5	4.3	1.5	9.9
2302	Cryptomeria japonica	5	4.5	1.4	1.5	2	1.6	9.2
2302-A	Cryptomeria japonica	4.8	4	1.4	1.5	1.8	5.5	5
1372	Cryptomeria japonica	5	6	0.2	1.5	2	3.5	3.5
1373	Liriodendron chinensis	23	18	15	2	2.5	3	2.5
1374	Cryptomeria japonica	16	10	1.5	3	3	3.5	8.5
1375	Liriodendron chinensis	22	17	12	3	2.5	1	9
2482	Cryptomeria japonica	8	7	1.5	1	1.5	6.5	9.5
2483	Cryptomeria japonica	9.6	8	0.3	1.5	1.5	7	9
2484	Liriodendron chinensis	17.6	16	12	2.5	2	8	8
2485	Cryptomeria japonica	7.5	6	0.2	2.3	2.5	9.9	9
2486	Camptotheca acuminata	19.2	18	14	2.5	3	9	7
2487	Cryptomeria japonica	6.6	7	1.8	1.5	2	8	7
2489	Camptotheca acuminata	8.7	11	8	1.2	1.5	8	0.8
2490	Camptotheca acuminata	14	13	10	2	2	6	0.1
2491	Camptotheca acuminata	15.5	14	11	1.5	1.5	4	1
2492	Camptotheca acuminata	10.1	11	8	1.5	1	1.5	2
2493	Camptotheca acuminata	8.5	8	4	2	1.5	2	2.5
2494	Camptotheca acuminata	10.1	9	1.4	2	2.3	3.5	5.5
2495	Cryptomeria japonica	11.7	8.5	1.4	2.5	3	3.5	5.5
2496	Camptotheca acuminata	14.8	15	12	1	1.5	6	5.4
2472	Cryptomeria japonica	19.7	12	1.7	2.8	3	7.5	9.5
2475	Liriodendron chinensis	14.5	15	11	2	2	4	0.8
2476	Cryptomeria japonica	10.1	8	1.5	2.6	2.4	7	7.5
2477	Camptotheca acuminata	21.8	15	10	2	2.5	7	7
2478	Cryptomeria japonica	12.8	8	0.2	2.5	2.4	3.5	6.5
2479	Camptotheca acuminata	17.5	16	12	1.8	2	2.5	4.5
2480	Camptotheca acuminata	11	12	8	0.4	0.3	1.2	5
2481	Camptotheca acuminata	11.5	12	8	0.9	1	1.5	7
2451	Camptotheca acuminata	7	10	3	0.5	0.4	9	4
2454	Camptotheca acuminata	20.7	17	12	2.8	3	7	6.5
2455	Camptotheca acuminata	5.9	7	3	0.5	0.5	8	1.5
2456	Camptotheca acuminata	7	8	4.5	0.5	0.6	8	1.6
2459	Cryptomeria japonica	17.2	8	1.6	2.5	3	7	6.8
2460	Cryptomeria japonica	10.8	8		1.5	1.2	7	6.8
2461	Cryptomeria japonica	8.1	7	1.8	1.5	2	6	6
2462	Cryptomeria japonica	12.4	13	2.4	1.5	2	5	6
2463	Camptotheca acuminata	9.1	10	6	0.5	0.4	7	9
2464	Cryptomeria japonica	6.1	6	1.5	3	1.8	5	7
2465	Camptotheca acuminata	16.7	14	12	3	3	5	9
2466	Cryptomeria japonica	6.8	6	0.2	1.5	2.5	1	8.5
2467	Cryptomeria japonica	9	7	1.5	3	2.5	2	6
2468	Cryptomeria japonica	5.5	6	0.5	2.5	2	2	6.1
2469	Cryptomeria japonica	5.5	6	1.6	1.8	2	4.5	3.5
2470	Cryptomeria japonica	5.8	5.5	1.2	1.8	1.5	3.5	3
2471	Cryptomeria japonica	8.9	7	1.4	2.8	2.5	3	3
1200	Cryptomeria japonica	10.9	6.8	2	2.2	1.5	5	0.5
1201	Cryptomeria japonica	5.9	7	1.4	1.2	1.1	3	0.5
1202	Camptotheca acuminata	16.5	21.6	13.5	3.5	3	5	3.5
1203	Cryptomeria japonica	11	14.6	4.3	4	3	8	4
1204	Liriodendron chinensis	46.5	26.8	1.7	6	6.2	9.5	4
1205	Cornus wilsoniana	3.5	7	5.2	1	1.5	9	4
1206	Cornus wilsoniana	4.5	6.5	4	1.8	1.5	8	4.1
1208	Cryptomeria japonica	10.8	7.5	0.3	1.5	1	7	6
1209	Camptotheca acuminata	5.7	7.8	3.2	1.3	2	6	7.5
1212	Camptotheca acuminata	4.9	6	5.5	4	7	9	6.9
1213	Camptotheca acuminata	22.3	22.5	12.3	7	6	1.4	3.8
1214	Cryptomeria japonica	14.1	9.6	0.8	3.5	3	1.5	4.3
1215	Camptotheca acuminata	16.8	18.7	11.6	2.2	2.8	0.5	5
1216	Cryptomeria japonica	12.1	9.8	2.5	1.5	1.2	0.3	6.5
1217	Cryptomeria japonica	6.9	6.2	1.4	1.6	1.5	0.3	6.5
1218	Cryptomeria japonica	7.4	6.5	1.4	1.6	1.5	0.3	6.5
1219	Cryptomeria japonica	12.1	7.3	1.4	4	4.5	3	3.5
1219-A	Cryptomeria japonica	5.7	5.8	0.5	1.5	2	3	3
1219-B	Cryptomeria japonica	14.1	6.5	0.5	3	3.2	5.5	8
1220	Liriodendron chinensis	30.6	19.6	14.2	4.5	4.5	1	2.7
1221	Liriodendron chinensis	9.9	8.6	3.2	0.3	0.4	3	0.8
1222	Camptotheca acuminata	4	6.4	2.3	0.7	0.8	4.2	1.8
1223	Camptotheca acuminata	24.4	18.7	14.3	2.5	2.6	6.4	1.8
1224	Camptotheca acuminata	16.4	14.7	12.9	1.9	2.3	8.5	0.2
1225	Cryptomeria japonica	12.3	8.3	0.2	1.9	2	8.5	0.2
1226	Camptotheca acuminata	21.5	18.8	16.3	2.5	2.6	8.5	5.6
1227	Cryptomeria japonica	11.1	7.9	0.6	3.2	2.6	8.5	5.6
1228	Liriodendron chinensis	7.5	8.1	4.6	2.3	3.5	6.6	7.4
1229	Cryptomeria japonica	16.7	0.5	0.6	3.9	4	6.1	7.5
1230	Camptotheca acuminata	9.3	11.2	9.6	2.1	2.3	4.1	9.2
1231	Camptotheca acuminata	13.8	14.8	12.7	2.3	3.2	4.1	6.3
1233	Camptotheca acuminata	18	19.2	16.8	2.3	1.2	3.5	6.1
1234	Cryptomeria japonica	7	8.4	0.8	1.3	1.2	3.5	6.1
1235	Cryptomeria japonica	6.9	7.3	0.6	1.2	1.4	0.4	9.8
1236	Cryptomeria japonica	5	4.2	0.6	1.4	1.5	0.6	9.5
1237	Cryptomeria japonica	6.8	5.2	0.4	0.7	0.6	2.4	9.8
1238	Camptotheca acuminata	15.3	16.9	14.7	2.3	2.4	2.2	9.6
1241	Cryptomeria japonica	5.4	4.9	0.1	1.2	1.4	2.3	9
1242	Cryptomeria japonica	12.4	9.2	0.6	1.2	1.3	1.8	6.2
1232-1	Cryptomeria japonica	3.2	5.1	0.6	0.5	0.3	3.8	6.2
1232-2	Cryptomeria japonica	9.6	6.9	0.3	1.9	2.3
Unlicensed	Cryptomeria japonica	3.8	7.5	0.7	1.1	1.2	3.6	6.1
Unlicensed	Cryptomeria japonica	3.9	3.5	0.2	0.4	0.5	0.7	9.4
Unlicensed	Cryptomeria japonica	4.5	5.3	0.3	1.9	1.8	7.1	9
Unlicensed	Cryptomeria japonica	6.5	7.3	0.7	1.1	1	1.8	6.2
1243	Camptotheca acuminata	8.6	11.2	2.1	0.6	0.6	0.2	3.6
1244	Liriodendron chinensis	18.4	18.4	4.4	3.9	3	1.7	6.5
1245	Liriodendron chinensis	19.8	17.9	8.6	3.2	3.3	0.3	7.5
1246	Cryptomeria japonica	14.6	8.3	1.2	2.4	2.7	6.2	6.9
1247	Liriodendron chinensis	23.1	18.2	10.8	4.2	4.3	3.9	4.3
1248	Camptotheca acuminata	7.9	11.5	1.8	1.6	1.2	3.9	0.5
1249	Liriodendron chinensis	31.5	19.6	11.2	4.5	4.9	5.6	2.4
1250	Cryptomeria japonica	2.9	3.5	0.2	0.6	0.6	6.7	3.9
1251	Cryptomeria japonica	1.9	2.4	0.3	0.7	0.7	6.8	3.6
1252	Cryptomeria japonica	17.8	10.3	1.5	2.9	2.7	8.8	1.5
1253	Cryptomeria japonica	11.5	11.4	1.2	2.6	2.3	9.3	1.5
1254	Camptotheca acuminata	14.4	16.2	12.3	1.4	1.5	9.3	4.5
1255	Cryptomeria japonica	17.8	14.3	1.8	1.9	2	9.4	4.6
1256	Camptotheca acuminata	16.6	15.4	13.2	1.8	1.9	9.7	8.7
1257	Camptotheca acuminata	9.1	12.3	3.6	1.2	1.5	6.8	7.3
1258	Cryptomeria japonica	4.2	3.2	0.6	1.5	1.4	5.5	9.6
Unlicensed	Cryptomeria japonica	2.6	2.9	0.3	0.8	0.7	6.9	3.3
Unlicensed	Cryptomeria japonica	5.9	4.2	0.7	1.2	1.1	6.3	9.3
Unlicensed	Cryptomeria japonica	2.5	3.6	0.3	0.6	0.7	5.9	9.8
Unlicensed	Cryptomeria japonica	3	3.9	0.4	0.5	0.6	5.8	9.8

## Sheet: Tree composition-M
Tree number	Species name	DBH cm	Tree height M	Height under branch M	Crown width（EW)m	Crown width（NS)m	coordinateX/m	coordinateY/m
1565	Michelia fuscata	6.3	6	1.9	1.5	4	9.8	4		North latitude:	29°3′36″	East longitude:	110°13′26″
1566	Cinnamomum camphora	12.6	11	8	2.5	2	7.5	7		Altitude:	635m
1567	Cryptomeria japonica	8.2	7.5	1.4	2.5	2.5	6	9.9		Canopy density	0.7
1568	Liriodendron chinensis	30.4	23	17	3	3.5	9.2	9.2		slope	21°
1569	Cinnamomum camphora	15.5	12	8	3	3.5	3	8
1571	Michelia fuscata	12	8	2.2	3.5	4	9.8	4
1573	Cinnamomum camphora	13.8	12	3.7	2	1	7	1
1574	Cinnamomum camphora	26.4	23	8	2.5	2	2	1
1575	Cinnamomum camphora	11.4	12	2.7	2	2	2	0.5
1576	Liriodendron chinensis	40.5	27	16	7	8	0.8	6
1557	Choerospondias axillaris	3	8	5	0.5	0.5	2	1.5
1558	Cinnamomum camphora	19.9	18	3	5	5	4	2.2
1559	Cinnamomum camphora	9.1	12	4	1	1.5	6	5
1560	Liriodendron chinensis	14.9	14	11	1	1	6	5
1561	Broussonetia papyifera	13	11	9.5	1.5	2	1	3.5
1562	Choerospondias axillaris	13.6	11	4	1.8	1.5	1.5	8.8
1564	Liriodendron chinensis	8.4	10.5	1.6	2.8	3.5	2.5	9.9
1738	Melia azedarach	25.9	19	8	3	3	4	9
1744	Choerospondias axillaris	19	16	13	5	4	6	2.5
1745	Choerospondias axillaris	23.4	18	13	3	4	6.1	2.5
1756	Liriodendron chinensis	35.8	23	12	5	6	7.5	4.5
1757	Liriodendron chinensis	19.3	18	13	4	4	9.7	9.9
补	Melia azedarach	13.5	15	12	5	4	6	3
1747	Melia azedarach	14.9	16	11	1	1	1	0.2
1748	Melia azedarach	14.8	15	10	2	2	0.2	2
1750	Melia azedarach	13.5	15	12	1	1	8.4	0.4
1751	Melia azedarach	17.5	16	13	2	2	8.5	0.4
1752	Liriodendron chinensis	34.5	28	16	8	8	9.2	2
1753	Cryptomeria japonica	5.1	6	1	3	2	9	3
1754	Cryptomeria japonica	4.1	5	1	2	2	9.5	3
1759	Melia azedarach	12	18	15	2	2	5	7.5
1760	Cryptomeria japonica	8.6	10	1	3	3	8	8
1761	Cryptomeria japonica	5.3	7	1	2	3	7.5	7
1762	Liriodendron chinensis	13.3	18	15	3	3	8	4.3
1763	Liriodendron chinensis	13.3	18	15	3	3	8	4.4
1764	Liriodendron chinensis	4	8	3	2	2	8	4.6
1905	Liriodendron chinensis	33.1	18	9	5	8	9	6
1908	Broussonetia papyifera	12.2	12	6	0.3	0.5	8.9	9
1909	Cryptomeria japonica	5.8	6	0.3	2	1.5	8.5	9.5
1910	Cryptomeria japonica	4.8	5.5	0.2	1	1	8	9.5
1912	Cryptomeria japonica	6.2	6	0.2	2	2	8	9
1913	Liriodendron chinensis	15.3	15	7	2	3.5	6	9
1914	Broussonetia papyifera	4.2	5.6	2	0.2	0.3	5.5	9
1916	Broussonetia papyifera	7.8	11	2	1.7	1	7	6
1917	Cryptomeria japonica	12.8	11	0.6	3	3	0.5	6
1918	Cryptomeria japonica	10.6	11	0.3	2	2	0.2	6
1919	Broussonetia papyifera	7.5	13	9.5	3	2	2	5.5
1920	Broussonetia papyifera	18.2	15	9	3	2	1	9
1921	Cryptomeria japonica	11.2	8	1.4	2	1	2.5	5
1922	Cryptomeria japonica	22.2	13	1.4	3.5	2	2	1
1758	Liriodendron chinensis	12.6	13	10	2	2	9.5	0
1786	Liriodendron chinensis	32.8	18	11.3	6	5	9	4
1787	Broussonetia papyifera	8.8	8	4.5	2	2	8	5
1789	Liriodendron chinensis	33.5	18	13	5	5	8	9
1790	Liriodendron chinensis	5.2	10	2	1	1	7	9.5
1791	Cryptomeria japonica	12	8	0.5	2	2	9	7
1792	Emmenopterys henryi	4.4	5	3	0.5	0.5	7	8
1793	Broussonetia papyifera	8.5	11	5	2	1	3	4
1794	Cryptomeria japonica	10.2	8	2	2	2	2.2	3.5
1795	Broussonetia papyifera	17.6	16	10	3	4	3	9
1796	Cryptomeria japonica	7.5	8	0.2	1.5	1.3	2	4
1797	Broussonetia papyifera	14.5	13	10	2	3	2	4
1798	Cryptomeria japonica	13.5	10	0.1	2	2	2.5	9.5
1799	Cryptomeria japonica	5.5	6	0.2	1.2	1.5	3	10
1800	Cryptomeria japonica	12.5	8	0.2	2	1	3	9.5
1901	Emmenopterys henryi	6.3	6	5	1.2	0.9	0	9.5
1903	Choerospondias axillaris	15.6	16	11	2.6	2	7	0.5
1904	Liriodendron chinensis	9.3	13	10	1	1	8	2
1906	Liriodendron chinensis	10.5	12	8	2	1	8	2
1765	Choerospondias axillaris	15.8	14	8	2	3	2	2
1766	Cryptomeria japonica	2.5	4	0.2	2	1.2	3.5	2
1767	Camptotheca acuminata	5.2	7	2	3	2	8	3
1769	Broussonetia papyifera	16.3	16	12	3	5	7	5
1770	Liquidambar taiwaniana	5.2	6	2	2.2	2	8	5
1771	Cryptomeria japonica	3.6	2.8	0.2	2	2	8	4
1772	Cryptomeria japonica	14.5	8	0.3	2.2	2.3	7	4
1773	Broussonetia papyifera	16.2	17	10	6	4	9.5	6
1774	Cryptomeria japonica	15.5	9.5	1.2	3	3	9	9
1775	Broussonetia papyifera	7.8	11	6	2	1.5	7	8
1776	Broussonetia papyifera	21.6	16	10	3	3	6	9
1777	Emmenopterys henryi	5.5	10	8	2	2	3	9
1778	Broussonetia papyifera	17.5	15	10.5	4	3	4	8
1779	Cryptomeria japonica	21.2	8	0.2	3	3	2	8
1782	Broussonetia papyifera	15.3	17	12	5	5	2	9
1783	Cryptomeria japonica	12.2	6	1.4	2	2	1	8
690	Cryptomeria japonica	5.2	5	0.3	2.2	2.5	7	4.2
691	Choerospondias axillaris	14.9	14	6	1.5	2.3	1.8	2
692	Choerospondias axillaris	16.1	15	6	2.5	1.3	3	0.8
693	Liriodendron chinensis	13.9	14	9	1.2	1.1	6	0.5
694	Cryptomeria japonica	7	5	0.2	1.2	1.5	8	4
697	Quercus acutissma	10.8	13	8	2.1	1.8	3.5	3
698	Quercus acutissma	3.5	5	1.7	0.5	1.5	2	4.2
699	Quercus acutissma	19.2	15	6	2.8	2.4	4	6
700	Cryptomeria japonica	4.6	5	1.4	1.2	1.3	1.5	7.8
701	Cryptomeria japonica	7.2	7	1.4	1.5	2	1.5	7.8
702	Cryptomeria japonica	5.8	6	1.5	1.2	1.2	1.5	7.8
703	Cryptomeria japonica	6.6	6	0.5	1.5	1.3	2.5	8
704	Quercus acutissma	10.6	12	9.6	1.2	1.3	2.5	8
705	Cryptomeria japonica	8.2	10	1.4	1.8	2.5	1	8
705	Cryptomeria japonica	8.8	10	1.4	1.2	1.5	1	8.5
706	Cryptomeria japonica	4.9	7	1.5	1.3	1.3	0.2	9
707	Cryptomeria japonica	8.1	6	1.2	1.2	1.2	0.2	9.8
708	Quercus acutissma	3.2	7	1.3	0.5	0.4	1.5	9.8
709	Quercus acutissma	6.7	12	9	0.8	0.6	4	9.5
710	Cryptomeria japonica	2.1	2	12	0.8	1.2	5	8
711	Quercus acutissma	18.8	16.2	11	2.8	2.1	6	7
712	Cryptomeria japonica	7.8	5	15	2.5	2.6	5	9.5
713	Quercus acutissma	8.2	12	7	0.8	1.2	6	9.1
714	Quercus acutissma	19.1	17	12	1.8	1.7	8	9.2
715	Quercus acutissma	17.2	16	12	2	3	10	8
716	Cryptomeria japonica	6.8	5	1.3	2.5	1.8	7	6.5
717	Liriodendron chinensis	20.8	16.5	10	2.5	1.8	9	5
718	Cryptomeria japonica	8.8	6	0.4	1.1	1.2	2.5	8
567	Liriodendron chinensis	17	18	12	3	3	2.2	0.7
568	Liriodendron chinensis	19	18	9	3.5	4	0.2	0.3
569	Liriodendron chinensis	10	11	3	2	2	1.5	6.3
570	Liriodendron chinensis	12	12	6.5	2	2	1.5	7.6
571	Melia azedarach	16	16	12	2	2	2.2	9
572	Melia azedarach	15.5	15	10	2	2	3.2	3
573	Cryptomeria japonica	5	5.5	1.3	1.8	1.5	8.2	7
575	Cryptomeria japonica	7	9.5	0.7	1.5	1.5	6.3	3.4
577	Melia azedarach	16	18	10	1	1.5	8.3	9
578	Cryptomeria japonica	8	5.2	1.4	2	1.5	9.1	9.7
579	Liriodendron chinensis	26	18	12	4	4	6	4.5
556	Liriodendron chinensis	36	28	16	8	5	9	9
558	Liriodendron chinensis	12.9	18	1.8	4	4	4	9.5
559	Cryptomeria japonica	5.2	3	0.5	3	2	0.5	9.5
560	Cryptomeria japonica	4.4	3	0.8	2	2	2	9
562	Liriodendron chinensis	34.2	29	18	5	8	3.2	2.5
563	Liriodendron chinensis	12.9	18	10	0.5	1	5	4
565	Melia azedarach	15	18	16	2	2	8.5	0.3
566	Melia azedarach	20.4	19	15	3	2	1.2	1.5
566-A	Liriodendron chinensis	27.7	28	16	5	3	4.5	7
458	Liriodendron chinensis	23.3	26	18	5	5	5	1.6
461	Pinus elliottii	24.5	25	16	5	5	8.3	3.5
462	Pinus elliottii	29.1	26	18	8	3	8	3.5
466	Pinus elliottii	32	26	15	5	5	4	9.6

## Sheet: Tree composition-L
Tree number	Species name	DBH cm	Tree height M	Height under branch M	Crown width（EW)m	Crown width（NS)m	coordinateX/m	coordinateY/m		20*30m
1543	Liriodendron chinensis	22	18	13	5	4	4.5	4		North latitude:	29°3′36″	East longitude:	110°13′26″
1544	Liriodendron chinensis	19.6	20	13	4	4	4	6		Altitude:	620m
1545	Liriodendron chinensis	20	18	12	5	5	3.5	9.5		Canopy density	0.7
1546	Liriodendron chinensis	29.1	28	15	5	5	9	8.5		slope	18°
1547	Liriodendron chinensis	16	20	13	5	4	9.5	8.5
1828	Liriodendron chinensis	19.4	21	2	2	2.1	1	8.5
1829	Liriodendron chinensis	19	18.5	14	2.5	1.5	0.8	9
1831	Liriodendron chinensis	16.8	18.5	1.3	1.2	1	2	4
1832	Liriodendron chinensis	25.2	19	3.5	2.5	2	2.5	2
1833	Liriodendron chinensis	25.1	22	17	2.8	2.3	3	0.3
1835	Liriodendron chinensis	12.1	14	1.8	2.3	2.2	8	2.5
1836	Liriodendron chinensis	22	21	5	2.8	2	7.5	4
1837	Liriodendron chinensis	16.4	18	2.7	1.8	2	7	6
1838	Liriodendron chinensis	22.9	20	15	2.5	2.3	6.9	8.5
1857	Liriodendron chinensis	17.6	16	11	3	3	9.8	3
1859	Liriodendron chinensis	33	20	10	5	5	9	4
1861	Liriodendron chinensis	31.7	19	13	4	5	4	4.9
1862	Liriodendron chinensis	11	12	2	1	1	5	1.5
1863	Liriodendron chinensis	5.8	5	3	2	1	4	8.5
1864	Liriodendron chinensis	7.4	5.5	2	3	1.5	4	8.5
1548	Liriodendron chinensis	23.8	20	15	5	5	1	2.5
1549	Liriodendron chinensis	25.4	20	16	7	4	1.5	0.1
1550	Liriodendron chinensis	35.9	24	18	5	5	6.5	3
1551	Liriodendron chinensis	25.9	23	16	2	3	6	5
1555	Liriodendron chinensis	9.6	12	7	3	3	5	9.5
1839	Liriodendron chinensis	28.8	23	4.5	1.5	1.6	2	5.5
1840	Liriodendron chinensis	29.4	24	18	2.2	2.3	2	5.5
1841	Liriodendron chinensis	18.5	20	1.5	2	1.8	1.8	8
1842	Liriodendron chinensis	17.8	17	2.4	1.5	1.2	1.7	9
1845	Liriodendron chinensis	16.1	12	8	1.5	1.5	6.5	7.5
1846	Liriodendron chinensis	21.2	20	8	1.5	2	8	1.5
1847	Liriodendron chinensis	23.4	18.2	7.6	2.2	1.8	8	1.5
1850	Liriodendron chinensis	14.2	17	13	2	1.8	8.8	0.3
1851	Choerospondias axillaris	15.8	10	1.3	2.5	2.5	8	4
1853	Choerospondias axillaris	12.2	13	8	1.8	1.5	1	8
1854	Camptotheca acuminata	8	10.5	9	1.2	1.2	0	9.9
1855	Choerospondias axillaris	9	8	4	0.1	0.1	1	7.5
1856	Liriodendron chinensis	30.8	18	13	5	5	0.2	1
106	Liriodendron chinensis	26	16	10	3.8	3.9	9.5	0
107	Pinus elliottii	7.8	8	0.5	2.5	3	8	0.2
108	Liriodendron chinensis	24.6	15	7	4.3	2.9	8	4.9
109	Melia azedarach	7.9	10	7	1.2	1.3	4	5
110	Melia azedarach	14.7	14	6	1.2	2.8	5.5	5.5
111	Liriodendron chinensis	21.6	16.7	11	2.5	1.8	9	8
112	Liriodendron chinensis	24.7	17.2	10.5	2.8	2	8	8
113	Liriodendron chinensis	21.6	15	10.5	2.3	2	9	8
115	Liriodendron chinensis	5.5	7	5.8	2	1.5	1	8
458	Liriodendron chinensis	23.3	26	18	5	5	5	1.6
461	Pinus elliottii	24.5	25	16	5	5	8.3	3.5
462	Pinus elliottii	29.1	26	18	8	3	8	3.5
466	Pinus elliottii	32	26	15	5	5	4	9.6
128	Liriodendron chinensis	29	20	6	4	4.5	0.3	7.7
129	Liriodendron chinensis	25.5	18	12	3	4	3	5.3
130	Liriodendron chinensis	18.5	16	6.5	3	3	7.2	2.4
131	Liriodendron chinensis	22	15	10	3	3.8	7.3	2.4
132	Vernicia fordii	9	9	3.5	3	3	2.8	1.5
133	Melia azedarach	10	15	9.5	1.5	1.5	7.9	0.8
135	Pinus elliottii	42.5	20	12	1	1.5	7.2	3
136	Liriodendron chinensis	39.5	20	6.5	7	7	9.7	1.3
117	Liriodendron chinensis	17.1	16	10.5	2.8	2.7	9.5	9.5
118	Liriodendron chinensis	14.9	13	8	3.8	2.7	9.8	8
119	Liriodendron chinensis	20.9	13.5	8	3	2.8	6	4
120	Liriodendron chinensis	5	6	5	0.5	0.6	2.5	2
121	Melia azedarach	5.2	7	8.1	1.2	4	2.5	2
122	Liriodendron chinensis	5.2	9	7.9	2.3	0.5	2.5	2
123	Liriodendron chinensis	4.9	8	7	1.2	1.5	1.2	1.8
125	Cryptomeria japonica	3.6	3.8	1	2	2	4.8	5
126	Cryptomeria japonica	1.8	2.1	0.5	0.8	0.7	4	1
467	Liriodendron chinensis	26.6	28	18	8	8	2	7.5
469	Liriodendron chinensis	19	19	13	2	3	7	9.9
470	Liriodendron chinensis	19.9	20	16	5	5	7	7.8
472	Liriodendron chinensis	22.2	23	16	5	5	7.2	6
474	Melia azedarach	11.8	18	13	0.5	1	6	5
475	Cryptomeria japonica	3.2	3	1	2	2	1.8	3
476	Liriodendron chinensis	23.5	26	18	5	8	3	2
478	Liriodendron chinensis	15.8	16	7	3	3	8.5	2.3
479	Liriodendron chinensis	15.3	18	13	2	3	9	1
480	Liriodendron chinensis	17	16	12	2	2	9.2	1
481	Liriodendron chinensis	8.2	12	8	1	1	9.1	1
481-A	Liriodendron chinensis	28.7	26	13	5	5	8	4

## Sheet: Tree compositioin-N
Tree number	Species name	DBH cm	Tree height M	Height under branch M	Crown width（EW)m	Crown width（NS)m	coordinateX/m	coordinateY/m		20*30m
1857	Liriodendron chinensis	22	18	13	5	4	4.5	4		North latitude:	29°3′36″	East longitude:	110°13′26″
1858	Liriodendron chinensis	19.6	20	13	4	4	4	6		Altitude:	612m
1859	Liriodendron chinensis	20	18	12	5	5	3.5	9.5		Canopy density	0.7
1860	Liriodendron chinensis	29.1	28	15	5	5	9	8.5		slope	19°
1861	Liriodendron chinensis	16	20	13	5	4	9.5	8.5
1862	Liriodendron chinensis	19.4	21	2	2	2.1	1	8.5
1863	Liriodendron chinensis	19	18.5	14	2.5	1.5	0.8	9
1864	Liriodendron chinensis	16.8	18.5	1.3	1.2	1	2	4
1865	Liriodendron chinensis	25.2	19	3.5	2.5	2	2.5	2
1866	Liriodendron chinensis	25.1	22	17	2.8	2.3	3	0.3
1867	Liriodendron chinensis	12.1	14	1.8	2.3	2.2	8	2.5
1868	Liriodendron chinensis	22	21	5	2.8	2	7.5	4
1869	Liriodendron chinensis	16.4	18	2.7	1.8	2	7	6
1870	Liriodendron chinensis	22.9	20	15	2.5	2.3	6.9	8.5
1871	Liriodendron chinensis	17.6	16	11	3	3	9.8	3
1872	Liriodendron chinensis	33	20	10	5	5	9	4
1873	Liriodendron chinensis	31.7	19	13	4	5	4	4.9
1874	Liriodendron chinensis	11	12	2	1	1	5	1.5
1875	Liriodendron chinensis	5.8	5	3	2	1	4	8.5
1876	Liriodendron chinensis	7.4	5.5	2	3	1.5	4	8.5
1877	Liriodendron chinensis	23.8	20	15	5	5	1	2.5
1878	Liriodendron chinensis	25.4	20	16	7	4	1.5	0.1
1879	Liriodendron chinensis	35.9	24	18	5	5	6.5	3
1880	Liriodendron chinensis	25.9	23	16	2	3	6	5
1881	Liriodendron chinensis	9.6	12	7	3	3	5	9.5
1882	Liriodendron chinensis	28.8	23	4.5	1.5	1.6	2	5.5
1883	Liriodendron chinensis	29.4	24	18	2.2	2.3	2	5.5
1884	Liriodendron chinensis	18.5	20	1.5	2	1.8	1.8	8
1885	Liriodendron chinensis	17.8	17	2.4	1.5	1.2	1.7	9
1886	Liriodendron chinensis	16.1	12	8	1.5	1.5	6.5	7.5
1887	Liriodendron chinensis	21.2	20	8	1.5	2	8	1.5
1888	Liriodendron chinensis	23.4	18.2	7.6	2.2	1.8	8	1.5
1889	Liriodendron chinensis	14.2	17	13	2	1.8	8.8	0.3
1890	Choerospondias axillaris	15.8	10	1.3	2.5	2.5	8	4
1891	Choerospondias axillaris	12.2	13	8	1.8	1.5	1	8
1892	Camptotheca acuminata	8	10.5	9	1.2	1.2	0	9.9
1893	Choerospondias axillaris	9	8	4	0.1	0.1	1	7.5
1894	Liriodendron chinensis	30.8	18	13	5	5	0.2	1
1895	Liriodendron chinensis	26	16	10	3.8	3.9	9.5	0
1896	Pine	7.8	8	0.5	2.5	3	8	0.2
1897	Liriodendron chinensis	24.6	15	7	4.3	2.9	8	4.9
1898	Melia azedarach	7.9	10	7	1.2	1.3	4	5
1899	Melia azedarach	14.7	14	6	1.2	2.8	5.5	5.5
1900	Liriodendron chinensis	21.6	16.7	11	2.5	1.8	9	8
1901	Liriodendron chinensis	24.7	17.2	10.5	2.8	2	8	8
1902	Liriodendron chinensis	21.6	15	10.5	2.3	2	9	8
1903	Liriodendron chinensis	5.5	7	5.8	2	1.5	1	8
1904	Liriodendron chinensis	23.3	26	18	5	5	5	1.6
1923	Pinus elliottii	24.5	25	16	5	5	8.3	3.5
1924	Pinus elliottii	29.1	26	18	8	3	8	3.5
1925	Pinus elliottii	32	26	15	5	5	4	9.6
1926	Liriodendron chinensis	29	20	6	4	4.5	0.3	7.7
1927	Liriodendron chinensis	25.5	18	12	3	4	3	5.3
1928	Liriodendron chinensis	18.5	16	6.5	3	3	7.2	2.4
1929	Liriodendron chinensis	22	15	10	3	3.8	7.3	2.4
1930	Vernicia fordii	9	9	3.5	3	3	2.8	1.5
1931	Melia azedarach	10	15	9.5	1.5	1.5	7.9	0.8
1932	Pinus elliottii	42.5	20	12	1	1.5	7.2	3
1933	Liriodendron chinensis	39.5	20	6.5	7	7	9.7	1.3
1934	Liriodendron chinensis	17.1	16	10.5	2.8	2.7	9.5	9.5
1935	Liriodendron chinensis	14.9	13	8	3.8	2.7	9.8	8
1936	Liriodendron chinensis	20.9	13.5	8	3	2.8	6	4
1937	Liriodendron chinensis	5	6	5	0.5	0.6	2.5	2
1939	Liriodendron chinensis	5.2	9	7.9	2.3	0.5	2.5	2
1940	Liriodendron chinensis	4.9	8	7	1.2	1.5	1.2	1.8
1941	Liriodendron chinensis	4.6	6.8	6	2.1	2.2	1.2	1.8
1943	Liriodendron chinensis	26.6	28	18	8	8	2	7.5
1944	Liriodendron chinensis	19	19	13	2	3	7	9.9
1945	Liriodendron chinensis	19.9	20	16	5	5	7	7.8
1946	Liriodendron chinensis	22.2	23	16	5	5	7.2	6
1949	Liriodendron chinensis	23.5	26	18	5	8	3	2
1950	Liriodendron chinensis	15.8	16	7	3	3	8.5	2.3
1951	Liriodendron chinensis	15.3	18	13	2	3	9	1
1952	Liriodendron chinensis	17	16	12	2	2	9.2	1
1953	Liriodendron chinensis	8.2	12	8	1	1	9.1	1
1954	Liriodendron chinensis	28.7	26	13	5	5	8	4

## Sheet: Soil properties
	pH		SOC(Soil Organic carbon)	TN(Total nitrogen)		TP(Total phosphorus)		TK(Total potassium)	AN(Alkali hydrolyzed nitrogen)	AP(Available phosphorus)	AK(Available potassium)	Soil density	Soil saturated water capacity	field capacity
	Soil: water=1:2.5		g/kg						mg/kg			g/cm3	%	%
1	5.61		13.356	1.269		0.39		16.014	131.32	1.518	140.829	0.937501	0.590496	0.539091
2	5.82		14.196	1.307		0.46		19.097	128.43	0.829	112.929	1.13003	0.638266	0.597832
3	5.65		11.966	1.211		0.467		17.417	114	0.816	96.986	1.1437	0.590984	0.528233
4	6.41		19.104	1.805		0.522		17.908	176.05	0.918	156.771	1.27256	0.309266	0.253822
5	5.89		18.219	1.469		0.378		16.681	164.51	0.727	104.957	1.34397	0.315042	0.269916
6	5.75		11.699	1.388		0.447		17.595	116.89	1.709	82.371	1.27725	0.356032	0.302348
7	5.7		12.475	1.288		0.408		17.309	115.45	1.25	90.343	1.28846	0.170618	0.10662
8	5.72		17.774	1.655		0.44		15.995	165.95	1.594	59.786	1.32813	0.293196	0.229483
9	6.35		16.51	1.742		0.451		18.625	151.52	2.347	146.143	1.2907	0.218105	0.16007
10	5.79		15.609	1.337		0.411		13.737	174.48	1.241	212.776	1.04719	0.276019	0.229389
11	5.87		11.721	1.576		0.394		17.684	180.96	0.812	181.602	1.08232	0.319534	0.215182
12	5.84		13.721	1.476		0.398		14.684	163.96	1.412	187.342	1.13576	0.254603	0.201259
